# Supplementary material
Source: publisher figshare collection journal article supplement (https://gsapubs.figshare.com/articles/dataset/_/21397173)
Supplement: Supplementary file 1 [file 1]

Eocene magmatism in the Himalaya: A response to lithospheric flexure during early Indian collision?

Lin Ma et al.

**Data Depository 3（Tables）**

**Table DR1 Summary of Eocene magmatic and metamorphic rocks in Tethyan Himalaya**

| **Sample No.** | **location** | **Latitude** | **Longitude** | **Age (Ma)** | **Dating method** | **Lithography** | **SiO2 (wt.%)** | **Origin** |
| --- | --- | --- | --- | --- | --- | --- | --- | --- |
| 13JT04 | Langshan | 28°58' | 92°09' | 45.0±1.4 | SIMS titanite U-Pb | gabbro | 42.66 | Ji et al. (2016) |
| T0394-AM | Yardoi | 28°48' | 91°54' | 43.5±1.3 | SHRIMP zircon U-Pb | amphibolite | 48.35 | Zeng et al. (2011) |
| T0395-03 | Yardoi | 28°45' | 92°01' | 47.6±1.8 | SHRIMP zircon U-Pb | biotite gneiss |  | Gao et al. (2012) |
| T0388 | Yardoi | 28°46' | 92°03' | 45.0±1.0 | SHRIMP zircon U-Pb | garnet amphibolite |  | Gao et al. (2012) |
| T0319-06 | Yardoi | 28°48' | 92°00' | 42.6±1.1 | SHRIMP zircon U-Pb | granite | 71.80 | Zeng et al. (2011) |
| 310037 | Yalaxiangbo | 28°47' | 92°03' | 42±5 | Biotites 40Ar/39Ar | granite | 71.85 | Aikman et al. (2012) |
| T471-1 | Yardoi | 28°49' | 91°57' | 43.3±0.2 | LA-ICPMS zircon U-Pb | granite | 73.52 | Zeng et al. (2015) |
| 405011 | Dala | 28°36' | 92°18' | 44.1±1.2 | SIMS zircon U–Pb | granite |  | Aikman et al. (2008) |
| T391 | Dala | 28°40' | 92°10' | 43.6±0.2 | LA-ICPMS zircon U-Pb | granite | 70.98 | Zeng et al. (2015) |
| cb-172 | Dala | 28°37' | 92°15' | 44.6±0.4 | SHRIMP zircon U-Pb | granite | 69.17 | Hou et al. (2012) |
| 410007 | Dala | 28°37' | 92°20' | 44.1±1.2 | SIMS zircon U–Pb | granite | 62.12 | Aikman et al. (2012) |
| G16379 | Dala | 28°42' | 92°15' | 43.3±0.6 | LA-ICPMS zircon U-Pb | granite | 70.26 | Dai et al. (2019) |
| G16385 | Dala | 28°40' | 92°15' | 43.4±0.4 | LA-ICPMS zircon U-Pb | granite | 70.28 | Dai et al. (2019) |
| G16391 | Dala | 28°42' | 92°15' | 43.2±0.5 | LA-ICPMS zircon U-Pb | granite | 70.00 | Dai et al. (2019) |
| G16397 | Dala | 28°43' | 92°16' | 43.4±0.4 | LA-ICPMS zircon U-Pb | granite | 67.18 | Dai et al. (2019) |
| cb-77-1 | Quedang | 28°29' | 92°17' | 46.3±0.5 | SHRIMP zircon U-Pb | granite | 69.25 | Hou et al. (2012) |

**Continued Table DR1**

| **Sample No.** | **location** | **Latitude** | **Longitude** | **Age (Ma)** | **Dating method** | **Lithography** | **SiO2 (wt.%)** | **Origin** |
| --- | --- | --- | --- | --- | --- | --- | --- | --- |
| cb-77-3 | Quedang | 28°29' | 92°17' | 45.4±0.4 | SHRIMP zircon U-Pb | granite (enclave) | 69.25 | Hou et al. (2012) |
| yx-9 | Yangxiong | 28°23' | 92°35' | 46.5±0.7 | SHRIMP zircon U-Pb | granite | 68.30 | Hou et al. (2012) |
| T0684 | Ridang | 28°40' | 92°12' | 41.4±0.2 | LA-ICPMS zircon U-Pb | granite | 74.92 | Zeng et al. (2015) |
| LM2 | Liemai | 28°27' | 92°40' | 48.5±1.1 | LA-ICPMS zircon U-Pb | granite | 71.34 | Tian et al. (2018) |
| 09FW115 | Rmba | 29°07' | 90°06' | 44.3±0.5 | SIMS zircon U–Pb | granite | 70.82 | Liu et al. (2014) |
| 12FW111 | Rmba | 29°08' | 90°09' | 44.1±0.8 | SIMS zircon U–Pb | granite | 67.62 | Liu et al. (2014) |
| 17JT13 | Haweng | 29°00' | 90°20' | 45.3±0.4 | SIMS zircon U–Pb | granodiorite | 71.37 | Ji et al. (2020) |
| 17JT16 | Haweng | 29°00' | 90°20' | 44.5±0.8 | SIMS zircon U–Pb | granodiorite | 71.48 | Ji et al. (2020) |
| 17JT15 | Haweng | 29°00' | 90°20' | 44.3±0.8 | LA-ICPMS zircon U-Pb | granodiorite | 73.53 | Ji et al. (2020) |
| 12FW75 | Haweng | 29°00' | 90°20' | 44.4±0.6 | LA-ICPMS zircon U-Pb | granodiorite | 69.98 | Ji et al. (2020) |
| 2000T16 | Niuku | 29°44' | 84°33' | 44.8±2.6 | SHRIMP zircon U-Pb | granite |  | Ding et al. (2005) |
| D8038Y | Buza | 28°48' | 86°22' | 45.5± | Biotites 40Ar/39Ar | granite | 72.06 | Pan et al. (2004) |
| D8201Y | Qubusang | 28°52' | 85°58' | 45.3± | Biotites 40Ar/39Ar | granite | 72.36 | Pan et al. (2004) |
| D3148Y | Louwu | 28°53' | 85°12' | 43.4± | Biotites 40Ar/39Ar | granite | 72.94 | Pan et al. (2004) |
| AY 06-29-06 10B | Zhegu Co | 28°59′ | 91°33′ | 56.9±4.4 | LA-ICPMS zircon U-Pb | detrital zircons |  | Webb et al. (2013) |
| JZ18-2-1 | Gyantse | 28°57′ | 89°34′ | 48.6±0.5 | SIMS zircon U–Pb | diabase | 50.77 | This study |

**Table DR2** **Bulk‐rock major, trace elemental compositions for the Gyantse mafic rocks in Tethyan Himalaya**

|  | **13JZ08-1** | **13JZ09-1** | **13JZ11-1** | **16ML16-1** | **16ML16-2** | **16ML16-3** | **16ML17-2** | **16ML17-4** | **JZ18-1-2** | **JZ18-1-3** |
| --- | --- | --- | --- | --- | --- | --- | --- | --- | --- | --- |
| Latutide | 28°57′24.8″ | 28°56′52.7″ | 28°59′11.7″ | 28°56′25.7″ | 28°56′25.7″ | 28°56′25.7″ | 28°57′17.5″ | 28°57′17.5″ | 28°57′25.5″ | 28°57′25.5″ |
| Longtitude | 89°34′05.5″ | 89°34′29.5″ | 89°36′17.7″ | 89°32′45.1″ | 89°32′45.1″ | 89°32′45.1″ | 89°32′42″ | 89°32′42″ | 89°34′09.3″ | 89°34′09.3″ |
| Rock type | gabbro | gabbro | gabbro | gabbro | gabbro | gabbro | gabbro | gabbro | diabase | diabase |
| SiO2 | 48.33 | 53.36 | 48.66 | 54.48 | 52.54 | 52.95 | 50.73 | 50.32 | 47.87 | 47.64 |
| TiO2 | 2.29 | 1.87 | 2.81 | 1.93 | 2.05 | 1.99 | 2.09 | 2.33 | 2.19 | 2.16 |
| Al2O3 | 13.24 | 14.50 | 14.09 | 11.35 | 12.25 | 10.90 | 14.93 | 13.52 | 11.73 | 11.87 |
| Fe2O3T | 11.46 | 9.51 | 12.77 | 10.08 | 10.95 | 11.05 | 10.00 | 10.33 | 11.99 | 12.10 |
| MnO | 0.16 | 0.13 | 0.21 | 0.15 | 0.15 | 0.15 | 0.16 | 0.13 | 0.16 | 0.16 |
| MgO | 8.77 | 4.98 | 5.96 | 8.90 | 8.45 | 9.90 | 6.28 | 5.84 | 11.69 | 11.73 |
| CaO | 8.94 | 7.04 | 8.78 | 6.38 | 7.45 | 6.89 | 9.48 | 9.72 | 7.72 | 7.85 |
| Na2O | 2.30 | 3.06 | 2.85 | 1.54 | 2.29 | 1.23 | 2.59 | 2.05 | 1.93 | 1.87 |
| K2O | 0.95 | 1.97 | 0.97 | 1.82 | 0.91 | 1.34 | 0.91 | 0.41 | 0.02 | 0.02 |
| P2O5 | 0.26 | 0.31 | 0.30 | 0.26 | 0.28 | 0.24 | 0.25 | 0.29 | 0.26 | 0.26 |
| LOI | 2.75 | 3.06 | 2.26 | 2.52 | 2.61 | 3.04 | 2.09 | 4.56 | 4.44 | 4.34 |
| Total | 99.45 | 99.78 | 99.65 | 99.42 | 99.92 | 99.68 | 99.5 | 99.5 | 100.00 | 100.00 |
| Sc | 24.0 | 24.2 | 24.4 | 22.3 | 22.7 | 25.2 | 27.7 | 27.6 | 22.4 | 23.1 |
| V | 222 | 194 | 280 | 183 | 187 | 196 | 227 | 246 | 217 | 223 |
| Cr | 524 | 163 | 53 | 722 | 622 | 815 | 255 | 133 | 894 | 919 |
| Co | 47.7 | 29.6 | 40.1 | 40.2 | 38.1 | 43.7 | 31.5 | 32.6 | 50.02 | 54.0 |
| Ni | 111 | 36.2 | 27.6 | 108 | 84.7 | 115 | 22.6 | 19.1 | 128 | 133 |
| Ga | 19.9 | 22.5 | 23.1 | 18.8 | 19.5 | 18.7 | 21.3 | 21.6 | 17.49 | 18.7 |
| Rb | 32.3 | 85.5 | 36.6 | 77.0 | 36.1 | 55.2 | 35.1 | 13.2 | 0.41 | 0.40 |
| Sr | 631 | 385 | 334 | 619 | 341 | 367 | 643 | 664 | 341 | 381 |
| Y | 22.9 | 32.2 | 28.9 | 30.5 | 30.5 | 30.3 | 25.9 | 29.4 | 24.7 | 25.3 |
| Zr | 195 | 279 | 244 | 270 | 247 | 252 | 192 | 216 | 178.4 | 185.6 |
| Nb | 11.8 | 14.4 | 18.2 | 16.5 | 15.3 | 15.1 | 12.6 | 14.1 | 11.9 | 11.7 |
| Cs | 1.41 | 4.08 | 1.73 | 2.58 | 1.48 | 2.04 | 1.60 | 1.20 | 0.34 | 0.37 |
| Ba | 292 | 441 | 390 | 373 | 164 | 261 | 331 | 139 | 16.4 | 17.2 |
| La | 18.8 | 31.7 | 26.0 | 29.3 | 27.8 | 27.3 | 18.2 | 22.6 | 18.4 | 18.3 |
| Ce | 44.3 | 70.8 | 57.7 | 66.6 | 63.5 | 61.8 | 43.7 | 52.7 | 42.5 | 43.1 |
| Pr | 6.02 | 9.16 | 7.50 | 8.41 | 8.18 | 7.88 | 5.94 | 7.15 | 5.73 | 5.82 |
| Nd | 27.2 | 39.4 | 32.1 | 35.4 | 34.2 | 33.5 | 26.3 | 31.3 | 25.7 | 26.2 |
| Sm | 6.31 | 8.78 | 7.34 | 7.56 | 7.44 | 7.22 | 6.11 | 7.16 | 5.72 | 5.92 |
| Eu | 2.01 | 2.47 | 2.40 | 1.97 | 2.18 | 1.94 | 1.98 | 2.20 | 1.86 | 1.90 |
| Gd | 6.24 | 8.68 | 7.46 | 6.61 | 6.56 | 6.48 | 5.55 | 6.38 | 5.87 | 5.62 |
| Tb | 0.92 | 1.23 | 1.11 | 1.04 | 1.03 | 1.00 | 0.88 | 1.01 | 0.91 | 0.87 |
| Dy | 5.16 | 6.85 | 6.19 | 6.06 | 6.00 | 5.96 | 5.15 | 5.92 | 4.94 | 4.82 |
| Ho | 0.95 | 1.32 | 1.18 | 1.19 | 1.18 | 1.17 | 1.01 | 1.16 | 0.94 | 0.94 |
| Er | 2.48 | 3.33 | 3.01 | 2.93 | 2.87 | 2.92 | 2.46 | 2.78 | 2.45 | 2.54 |
| Tm | 0.34 | 0.46 | 0.42 | 0.42 | 0.41 | 0.42 | 0.35 | 0.40 | 0.34 | 0.35 |
| Yb | 2.06 | 2.79 | 2.53 | 2.58 | 2.58 | 2.57 | 2.14 | 2.43 | 2.13 | 2.07 |
| Lu | 0.31 | 0.41 | 0.39 | 0.40 | 0.39 | 0.41 | 0.33 | 0.36 | 0.27 | 0.29 |
| Hf | 4.93 | 7.15 | 6.43 | 7.23 | 6.51 | 6.52 | 5.05 | 5.75 | 4.52 | 4.80 |
| Ta | 0.85 | 1.09 | 1.28 | 1.21 | 1.09 | 1.10 | 0.86 | 0.98 | 0.84 | 0.87 |
| Pb | 2.83 | 7.13 | 15.92 | 13.49 | 4.74 | 4.45 | 3.31 | 4.91 | 4.93 | 5.42 |
| Th | 4.24 | 9.70 | 5.46 | 9.84 | 8.59 | 8.92 | 4.11 | 4.85 | 3.79 | 4.04 |
| U | 0.78 | 1.71 | 1.09 | 1.76 | 1.50 | 1.58 | 0.78 | 0.89 | 0.71 | 0.78 |

**Continued Table DR2**

|  | **JZ18-1-4** | **JZ18-2-1** | **JZ18-2-2** | **JZ18-2-5** | **16ML17-1** | **JZ18-1-1** | **JZ18-2-3** | **JZ18-2-4** | **13JZ11-3** |
| --- | --- | --- | --- | --- | --- | --- | --- | --- | --- |
| Latutide | 28°57′25.5″ | 28°57′25.3″ | 28°57′25.3″ | 28°57′25.3″ | 28°57′17.5″ | 28°57′25.5″ | 28°57′25.3″ | 28°57′25.3″ | 28°59′11.7″ |
| Longtitude | 89°34′09.3″ | 89°34′15.7″ | 89°34′15.7″ | 89°34′15.7″ | 89°32′42″ | 89°34′09.3″ | 89°34′15.7″ | 89°34′15.7″ | 89°36′17.7″ |
| Rock type | diabase | diabase | diabase | diabase | gabbro | diabase | diabase | diabase | gabbro |
| SiO2 | 47.70 | 50.77 | 50.19 | 48.02 | 46.99 | 46.02 | 49.79 | 47.67 | 41.15 |
| TiO2 | 2.27 | 2.59 | 2.62 | 2.35 | 2.18 | 2.09 | 2.87 | 2.75 | 2.21 |
| Al2O3 | 11.59 | 14.73 | 14.58 | 12.42 | 13.07 | 11.06 | 14.07 | 13.62 | 11.76 |
| Fe2O3T | 12.02 | 10.52 | 10.42 | 11.87 | 10.29 | 12.02 | 11.66 | 11.63 | 15.42 |
| MnO | 0.16 | 0.15 | 0.15 | 0.16 | 0.16 | 0.15 | 0.17 | 0.15 | 0.18 |
| MgO | 11.91 | 5.73 | 5.69 | 10.19 | 7.92 | 12.38 | 5.91 | 6.05 | 13.87 |
| CaO | 7.87 | 8.44 | 7.57 | 8.32 | 7.59 | 7.05 | 4.89 | 6.56 | 8.30 |
| Na2O | 1.76 | 3.06 | 2.90 | 2.13 | 2.08 | 1.24 | 3.20 | 1.71 | 1.09 |
| K2O | 0.02 | 1.40 | 2.09 | 0.02 | 0.15 | 0.02 | 0.02 | 0.29 | 0.65 |
| P2O5 | 0.26 | 0.31 | 0.31 | 0.28 | 0.23 | 0.26 | 0.35 | 0.33 | 0.23 |
| LOI | 4.33 | 2.29 | 3.11 | 3.99 | 9.05 | 7.48 | 7.39 | 9.08 | 4.62 |
| Total | 99.89 | 99.97 | 99.63 | 99.74 | 99.71 | 99.77 | 100.31 | 99.85 | 99.47 |
| Sc | 23.1 | 27.6 | 26.6 | 23.6 | 23.5 | 21.8 | 24.8 | 24.7 | 26.3 |
| V | 224 | 263 | 256 | 228 | 217 | 210 | 259 | 261 | 252 |
| Cr | 935 | 145 | 149 | 679 | 431 | 994 | 93 | 103 | 128 |
| Co | 52.1 | 32.4 | 27.2 | 55.3 | 39.5 | 60.4 | 35.3 | 37.0 | 89.7 |
| Ni | 133 | 19.8 | 19.5 | 186 | 54.9 | 149 | 45.5 | 51.2 | 128 |
| Ga | 18.0 | 23.0 | 22.3 | 19.3 | 19.1 | 17.5 | 22.8 | 21.8 | 19.7 |
| Rb | 0.390 | 52.4 | 71.9 | 0.340 | 6.70 | 0.700 | 0.950 | 17.6 | 25.0 |
| Sr | 349 | 608 | 584 | 527 | 496 | 255 | 184 | 182 | 71.0 |
| Y | 25.5 | 30.7 | 30.0 | 25.9 | 23.4 | 23.9 | 36.6 | 36.0 | 25.2 |
| Zr | 187 | 223 | 218 | 187 | 181 | 165 | 280 | 274 | 188 |
| Nb | 12.4 | 14.4 | 13.8 | 12.6 | 12.6 | 11.4 | 21. 5 | 20.6 | 15.7 |
| Cs | 0.330 | 2.06 | 2.94 | 0.260 | 0.850 | 0.420 | 0.090 | 0.760 | 1.85 |
| Ba | 15.7 | 281 | 608 | 16.7 | 48.0 | 26.5 | 11.6 | 40.0 | 129 |
| La | 19.1 | 22.9 | 22.6 | 19.6 | 17.7 | 18.1 | 30.2 | 29.5 | 22.3 |
| Ce | 44.4 | 53.2 | 51.7 | 44.9 | 41.3 | 41.1 | 66.2 | 65.3 | 49.6 |
| Pr | 5.82 | 7.06 | 6.87 | 5.91 | 5.48 | 5.59 | 8.57 | 8.20 | 6.4 |
| Nd | 26.1 | 31.1 | 30.6 | 26.5 | 24.1 | 24.7 | 36.1 | 35.5 | 27.6 |
| Sm | 5.91 | 7.12 | 7.06 | 6.16 | 5.57 | 5.75 | 8.08 | 7.57 | 6.31 |
| Eu | 1.97 | 2.34 | 2.37 | 1.99 | 1.88 | 1.87 | 2.49 | 2.52 | 2.03 |
| Gd | 5.87 | 7.35 | 7.16 | 6.39 | 4.93 | 5.48 | 8.08 | 8.20 | 6.35 |
| Tb | 0.92 | 1.12 | 1.07 | 0.96 | 0.80 | 0.84 | 1.24 | 1.25 | 0.94 |
| Dy | 4.93 | 6.06 | 6.00 | 5.04 | 4.73 | 4.66 | 6.93 | 6.84 | 5.30 |
| Ho | 0.97 | 1.20 | 1.11 | 0.99 | 0.92 | 0.92 | 1.38 | 1.34 | 1.02 |
| Er | 2.45 | 3.06 | 2.88 | 2.62 | 2.24 | 2.35 | 3.55 | 3.36 | 2.60 |
| Tm | 0.34 | 0.45 | 0.42 | 0.37 | 0.31 | 0.32 | 0.48 | 0.49 | 0.36 |
| Yb | 2.01 | 2.56 | 2.43 | 2.11 | 1.90 | 1.94 | 3.06 | 2.99 | 2.21 |
| Lu | 0.29 | 0.35 | 0.34 | 0.30 | 0.29 | 0.26 | 0.43 | 0.41 | 0.33 |
| Hf | 4.68 | 5.81 | 5.53 | 4.72 | 4.77 | 4.40 | 7.04 | 7.05 | 4.95 |
| Ta | 0.87 | 1.01 | 0.99 | 0.92 | 0.88 | 0.81 | 1.50 | 1.43 | 1.11 |
| Pb | 5.98 | 4.12 | 5.20 | 5.95 | 2.77 | 6.81 | 6.44 | 4.43 | 0.70 |
| Th | 4.05 | 4.93 | 4.72 | 4.00 | 3.57 | 3.49 | 7.40 | 7.34 | 5.14 |
| U | 0.77 | 0.87 | 0.89 | 0.77 | 0.65 | 0.69 | 1.34 | 1.45 | 1.01 |

**Table DR3 Bulk‐rock Sr‐Nd isotopic compositions for the Gyantse mafic rocks in Tethyan Himalaya**

| **Sample** | **Rb** | **Sr** | **87Rb/86Sr** | **87Sr/86Sr** | **2σ** | **87Sr/86Sr(i)** | **(87Sr/86Sr)CHUR** | **εSr(t)** | **Sm** | **Nd** | **147Sm/144Nd** | **143Nd/144Nd** | **2σ** | **εNd(t)** |
| --- | --- | --- | --- | --- | --- | --- | --- | --- | --- | --- | --- | --- | --- | --- |
| 13JZ08-1 | 32.3 | 631.3 | 0.148220 | 0.707737 | 0.000010 | 0.707632 | 0.704442 | 45.3 | 6.31 | 27.19 | 0.1403 | 0.512502 | 0.000005 | -2.29 |
| 13JZ11-1 | 36.6 | 334.1 | 0.317199 | 0.709792 | 0.000012 | 0.709566 | 0.704442 | 72.7 | 7.34 | 32.08 | 0.1383 | 0.512515 | 0.000005 | -2.03 |
| 13JZ11-3 | 25.0 | 71.0 | 1.019962 | 0.708671 | 0.000012 | 0.707946 | 0.704442 | 49.7 | 6.31 | 27.56 | 0.1384 | 0.512495 | 0.000006 | -2.41 |
| JZ18-1-1 | 0.7 | 255.0 | 0.007916 | 0.708366 | 0.000010 | 0.708360 | 0.704442 | 55.6 | 5.75 | 24.67 | 0.1409 | 0.512510 | 0.000011 | -2.14 |
| JZ18-1-3 | 0.40 | 380.6 | 0.003012 | 0.708204 | 0.000007 | 0.708202 | 0.704442 | 53.4 | 5.92 | 26.21 | 0.1365 | 0.512512 | 0.000013 | -2.07 |
| JZ18-2-1 | 52.42 | 608.4 | 0.249297 | 0.707755 | 0.000009 | 0.707578 | 0.704442 | 44.5 | 7.12 | 31.09 | 0.1385 | 0.512513 | 0.000009 | -2.07 |
| JZ18-2-2 | 71.9 | 583.9 | 0.356306 | 0.708021 | 0.000007 | 0.707768 | 0.704442 | 47.2 | 7.06 | 30.55 | 0.1396 | 0.512507 | 0.000004 | -2.19 |
| JZ18-2-4 | 17.6 | 181.7 | 0.280976 | 0.711653 | 0.000008 | 0.711453 | 0.704442 | 99.5 | 7.57 | 35.51 | 0.1289 | 0.512480 | 0.000011 | -2.65 |

**Table DR4** **SIMS zircon U‐Pb dating and O isotopes for the Gyantse mafic rocks in Tethyan Himalaya**

| **Analysis spot** | **U** | **Th** | **Pb** | **Th/U** | **238U/206Pba** | **±σ** | **207Pb/206Pba** | **±σ** | **206Pb/204Pb** | **207-corr ageb** | **±σ** | **δ18O** | **±σ** |
| --- | --- | --- | --- | --- | --- | --- | --- | --- | --- | --- | --- | --- | --- |
| **ppm** | **ppm** | **ppm** |  |  | **%** |  | **%** |  | **Ma** |  | **‰** |  |
| JZ18-2-1B@01 | 292 | 152 | 3.17 | 0.52 | 125.5 | 1.70 | 0.08246 | 1.47 | 236 | 48.9 | 0.8 | 5.76 | 0.28 |
| JZ18-2-1B@02 | 490 | 505 | 5.13 | 1.03 | 131.6 | 1.65 | 0.04908 | 1.53 | 5128 | 48.7 | 0.8 | 5.82 | 0.19 |
| JZ18-2-1B@03 | 154 | 71 | 1.49 | 0.46 | 129.9 | 2.17 | 0.06355 | 2.19 | 761 | 48.4 | 1.0 | 6.11 | 0.25 |
| JZ18-2-1B@04 | 293 | 140 | 2.69 | 0.48 | 131.2 | 1.95 | 0.06729 | 11.5 | 1813 | 47.7 | 1.0 | 6.42 | 0.25 |
| JZ18-2-1B@05 | 386 | 261 | 3.84 | 0.68 | 127.0 | 1.73 | 0.04822 | 1.50 | 5992 | 50.5 | 0.9 | 5.82 | 0.30 |
| JZ18-2-1B@06 | 405 | 310 | 4.65 | 0.77 | 125.3 | 2.37 | 0.08937 | 18.2 | 327 | 48.5 | 1.6 | 6.11 | 0.32 |
| JZ18-2-1B@07 | 122 | 48 | 1.09 | 0.40 | 131.3 | 1.91 | 0.04634 | 3.14 | 14221 | 48.9 | 0.9 | 5.96 | 0.15 |
| JZ18-2-1B@08 | 172 | 147 | 2.21 | 0.85 | 121.3 | 2.57 | 0.13485 | 12.8 | 163 | 47.1 | 1.7 | 5.76 | 0.37 |
| JZ18-2-1B@09 | 215 | 209 | 2.11 | 0.98 | 139.9 | 2.92 | 0.04872 | 1.98 | 4992 | 45.8 | 1.3 | 5.90 | 0.15 |
| JZ18-2-1B@10 | 502 | 609 | 5.53 | 1.21 | 129.3 | 1.82 | 0.04743 | 1.42 | 15018 | 49.7 | 0.9 | 5.08 | 0.23 |
| JZ18-2-1B@11 | 337 | 362 | 3.51 | 1.07 | 132.6 | 1.66 | 0.04897 | 1.60 | 6309 | 48.3 | 0.8 | 5.63 | 0.34 |
| JZ18-2-1B@12 | 130 | 103 | 1.25 | 0.79 | 135.7 | 2.25 | 0.05150 | 2.54 | 5044 | 47.0 | 1.1 | 5.97 | 0.26 |
| JZ18-2-1B@13 | 173 | 139 | 1.67 | 0.80 | 133.6 | 2.41 | 0.04925 | 2.24 | 2535 | 47.9 | 1.2 | 6.14 | 0.24 |
| JZ18-2-1B@14 | 307 | 120 | 2.73 | 0.39 | 131.7 | 1.70 | 0.04712 | 1.69 | 25862 | 48.8 | 0.8 | 6.26 | 0.24 |

a 238U/206Pb and 207Pb/206Pb ratios are not corrected for common lead.

b 207-corr age refers to 206Pb/238U age that is corrected for common lead based on 207Pb-based method with common lead isotope composition of 207Pb/206Pb ratio anchored at 0.8356.

**Table DR5 Representative pressure-temperature (P-T) and thermal gradients for Cenozoic metamorphism in Himalaya**

| **No.** | **Location** | **Longitude** | **Latitude** | **Age （Ma）** | **T（°C）** | **P (GPa)** | **Ref.** |
| --- | --- | --- | --- | --- | --- | --- | --- |
| 1 | Sikkim | 88°11′48"E | 27°24′18"N | 23 | 750 | 1.2 | Harris et al., 2004 |
| 2 | Yadong | 88°50′E | 27°25′N | 30 | 845 | 1.2 | Zhang et al., 2017 |
| 3 | Barun | 87°12′21″E | 27°39′34″N | 22-11 | 800 | 1 | Groppo et al., 2012 |
| 4 | Sikkim | 88°32′33"E | 27°45′58"N | ~31-17 | 800 | 0.9 | Rubatto et al., 2013 |
| 5 | Jomolhari | 89°20′59″E | 27°47′49″N | 36 | 800 | 0.85 | Regis et al., 2014 |
| 6 | Rani Pauwa | 85°13′E | 27°49′N | 44-38 | 760 | 1.05 | Khanal et al., 2021 |
| 7 | Sikkim | 88°33'2"E | 27°50'15"N | 36 | 800 | 0.9 | Rubatto et al., 2013 |
| 8 | Nyalam transect | 85°40′E | 27°55′N | 19 | 690 | 1.03 | Wang et al., 2015 |
| 9 | Nyalam transect | 85°40′E | 27°55′N | 10-8 | 637 | 0.92 | Wang et al., 2015 |
| 10 | Everest | 87°0′45"E | 27°59'16"N | 39 | 770 | 0.5 | Cottle et al., 2009 |
| 11 | Ama Drime Massif | 87.391009°E | 28.182265°N | 38 | 750 | 1.5 | Kellett et al., 2014 |
| 12 | Annapurna | 83.50°E | 28.25°N | 37 | 775 | 1 | Kohn and Corrie, 2011 |
| 13 | Duplex | 85°30′E | 28°10′N | 3.5 | 550 | 0.8 | Kohn, 2008 |
| 14 | Langtang(Munsiari thrust) | 85°30′E | 28°10′N | 10.5 | 725 | 1.2 | Kohn, 2008 |
| 15 | Langtang(Main Central thrust) | 85°30′E | 28°10′N | 16 | 725 | 1.2 | Kohn, 2008 |
| 16 | Langtang(Langtang thrust) | 85°30′E | 28°10′N | 21 | 825 | 0.8 | Kohn, 2008 |
| 17 | Nyalam transect | 85°40′E | 28°10′N | 19-16 | 690 | 1 | Wang et al., 2016 |
| 18 | Nyalam transect | 85°40′E | 28°10′N | 25-16 | 790 | 0.9 | Wang et al., 2016 |
| 19 | Dinggye | 87°20′E | 28°10′N | 30-29 | 830 | 1 | Wang et al., 2017 |
| 20 | Nyalam transect | 86°01′E | 28°10′N | 39.7-34 | 667 | 1.26 | Wang et al., 2013 |
| 21 | Nyalam | 86°0′1″E | 28°13′3″N | 32 | 750 | 0.69 | Wang et al., 2015 |
| 22 | Gyirong-Syabrubensi-Langtang | 85°21′E | 28°14′N | 24 | 720 | 0.9 | Khanal et al., 2020 |
| 23 | Gyirong-Syabrubensi-Langtang | 85°21′E | 28°14′N | 33 | 710 | 1.2 | Khanal et al., 2020 |
| 24 | Nepal | 87°28′E | 28°14′N | 25-15 | 970 | 1.1 | Wang et al., 2021 |
| 25 | Everest | 87°20′E | 28°20′N | 30 | 770 | 2 | Wang et al., 2021 |
| 26 | Kali Gandaki | 84°50′E | 28°30′N | 36-28 | 720 | 1.1 | Iaccarino et al., 2015 |
| 27 | Mabja dome | 88°30′E | 28°50′N | 35 | 705 | 0.82 | Lee and Whitehouse, 2007 |
| 28 | Sikkim-Darjeeling | 88°40′E | 28°50′N | ~8 | 800 | 1 | Ganguly et al., 2000 |
| 29 | Bhutan |  |  | 8 | 800 | 1.2 | Kohn, 2014 |
| 30 | Yardoi dome | 92°03′E | 28°50′N | 18-17 | 650 | 0.9 | Wang et al., 2018 |
| 31 | Yardoi dome | 92°03′E | 28°50′N | 48-36 | 665 | 0.8 | Ding et al., 2016a |
| 32 | Yardoi dome | 92°03′E | 28°50′N | 48-45 | 660 | 0.8 | Ding et al., 2016b |
| 33 | Bhutan | 89°45′1.34″E | 28°6′8.31″N | 14 | 800 | 0.9 | Grujic et al., 2011 |
| 34 | Nepal | 87°24′E | 28°9′N | 30 | 770 | 2 | Wang et al., 2021 |
| 35 | Namche Barwa Syntaxis | 95°20′E | 29°20′N | 40 | 880 | 1.6 | Zhang et al., 2015 |

**Table DR6 data source of 143Nd/144Nd and Nb/Ta ratios for representative components**

| **Component** | **Data Source** |
| --- | --- |
| Tethyan MORB | Xu and Castillo (2004) |
| Panjal basalt | Shellnutt et al. (2014), |
| Tethyan Himalaya Eocene granite | Zeng et al. (2011) |
| Tethyan Himalaya Eocene granite | Hou et al. (2012) |
| Oligo-Miocene leucogranite | Guo and Wilson (2012) |
| Continental crust | Rudnick and Gao (2003) |
| MORB, DMM | Sun and McDonough (1989) |
| GLOSS | Plank and Langmuir, 1998 |

**References Cited**

Aikman, A. B., Harrison, T. M., and Hermann, J., 2012, The origin of Eo- and Neo-himalayan granitoids, Eastern Tibet: Journal of Asian Earth Sciences, v. 58, p. 143-157.

Aikman, A. B., Harrison, T. M., and Lin, D., 2008, Evidence for Early (>44 Ma) Himalayan Crustal Thickening, Tethyan Himalaya, southeastern Tibet: Earth and Planetary Science Letters, v. 274, no. 1, p. 14-23.

Cottle, John M., Searle, Michael P., Horstwood, Matthew S. A., and Waters, David J., 2009, Timing of Midcrustal Metamorphism, Melting, and Deformation in the Mount Everest Region of Southern Tibet Revealed by U(‐Th)‐Pb Geochronology: The Journal of Geology, v. 117, no. 6, p. 643-664.

Dai, Z., Dong, L., Li, G., Huizenga, J. M., Ding, J., Zhang, L., Huang, Y., Cao, H., Lu, L., and Yan, G., 2020, Crustal thickening prior to 43 Ma in the Himalaya: Evidence from lower crust-derived adakitic magmatism in Dala, eastern Tethyan Himalaya, Tibet: Geological Journal, v. 55, no. 5, p. 4021-4046.

Ding, H., Zhang, Z., Dong, X., Tian, Z., Xiang, H., Mu, H., Gou, Z., Shui, X., Li, W., and Mao, L., 2016a, Early Eocene (c. 50 Ma) collision of the Indian and Asian continents: Constraints from the North Himalayan metamorphic rocks, southeastern Tibet: Earth and Planetary Science Letters, v. 435, p. 64-73.

Ding, H., Zhang, Z., Hu, K., Dong, X., Xiang, H., and Mu, H., 2016b, P–T–t–D paths of the North Himalayan metamorphic rocks: Implications for the Himalayan orogeny: Tectonophysics, v. 683, p. 393-404.

Ding, L., Kapp, P., and Wan, X., 2005, Paleocene–Eocene record of ophiolite obduction and initial India‐Asia collision, south central Tibet: Tectonics, v. 24, no. 3, p. TC3001, doi:3010.1029/2004TC001729.

Donaldson, D. G., Webb, A. A. G., Menold, C. A., Kylander-Clark, A. R. C., and Hacker, B. R., 2013, Petrochronology of Himalayan ultrahigh-pressure eclogite: Geology, v. 41, no. 8, p. 835-838.

Ganguly, J., Dasgupta, S., Cheng, W., and Neogi, S., 2000, Exhumation history of a section of the Sikkim Himalayas, India: records in the metamorphic mineral equilibria and compositional zoning of garnet: Earth and Planetary Science Letters, v. 183, no. 3, p. 471-486.

Gao, L.-E., Zeng, L., and Xie, K., 2012, Eocene high grade metamorphism and crustal anatexis in the North Himalaya Gneiss Domes, Southern Tibet.: Chinese Science Bulletin, v. 56, p. 639-650.

Groppo, C., Rolfo, F., and Indares, A., 2012, Partial Melting in the Higher Himalayan Crystallines of Eastern Nepal: the Effect of Decompression and Implications for the ‘Channel Flow’ Model: Journal of Petrology, v. 53, no. 5, p. 1057-1088.

Guo, Z., and Wilson, M., 2012, The Himalayan leucogranites: constraints on the nature of their crustal source region and geodynamic setting: Gondwana Research, v. 22, no. 2, p. 360-376.

Guo, Z., and Wilson, M., 2012, The Himalayan leucogranites: Constraints on the nature of their crustal source region and geodynamic setting: Gondwana Research, v. 22, no. 2, p. 360-376.

Harris, N. B. W., Caddick, M., Kosler, J., Goswami, S., Vance, D., and Tindle, A. G., 2004, The pressure–temperature–time path of migmatites from the Sikkim Himalaya: Journal of Metamorphic Geology, v. 22, no. 3, p. 249-264.

Horton, F., Lee, J., Hacker, B., Bowman-Kamaha’o, M., and Cosca, M., 2015, Himalayan gneiss dome formation in the middle crust and exhumation by normal faulting: New geochronology of Gianbul dome, northwestern India: GSA Bulletin, v. 127, no. 1-2, p. 162-180.

Hou, Z.-Q., Zheng, Y.-C., Zeng, L.-S., Gao, L.-E., Huang, K.-X., Li, W., Li, Q.-Y., Fu, Q., Liang, W., and Sun, Q.-Z., 2012, Eocene–Oligocene granitoids in southern Tibet: constraints on crustal anatexis and tectonic evolution of the Himalayan orogen: Earth and Planetary Science Letters, v. 349, p. 38-52.

Iaccarino, S., Montomoli, C., Carosi, R., Massonne, H.-J., Langone, A., and Visonà, D., 2015, Pressure–temperature–time–deformation path of kyanite-bearing migmatitic paragneiss in the Kali Gandaki valley (Central Nepal): Investigation of Late Eocene–Early Oligocene melting processes: Lithos, v. 231, p. 103-121.

Ji, W. Q., Wu, F. Y., Chung, S. L., Wang, X. C., Liu, C. Z., Li, Q. L., Liu, Z. C., Liu, X. C., and Wang, J. G., 2016, Eocene Neo-Tethyan slab breakoff constrained by 45 Ma oceanic island basalt-type magmatism in southern Tibet: Geology, v. 44, no. 4, p. 283-286.

Ji, W.-Q., Wu, F.-Y., Wang, J.-M., Liu, X.-C., Liu, Z.-C., Zhang, Z., Cao, W., Wang, J.-G., and Zhang, C., 2020, Early Evolution of Himalayan Orogenic Belt and Generation of Middle Eocene Magmatism: Constraint From Haweng Granodiorite Porphyry in the Tethyan Himalaya: Frontiers in Earth Science, v. 8, no. 236.

Kaneko, Y., Katayama, I., Yamamoto, H., Misawa, K., Ishikawa, M., Rehman, H. U., Kausar, A. B., and Shiraishi, K., 2003, Timing of Himalayan ultrahigh-pressure metamorphism: sinking rate and subduction angle of the Indian continental crust beneath Asia: Journal of Metamorphic Geology, v. 21, no. 6, p. 589-599.

Kellett, D. A., Cottle, J. M., and Smit, M., 2014, Eocene deep crust at Ama Drime, Tibet: Early evolution of the Himalayan orogen: Lithosphere, v. 6, no. 4, p. 220-229.

Khanal, G. P., Wang, J.-M., Larson, K. P., Wu, F.-Y., Rai, S. M., Wang, J.-G., and Yang, L., 2021, Eocene Metamorphism and Anatexis in the Kathmandu Klippe, Central Nepal: Implications for Early Crustal Thickening and Initial Rise of the Himalaya: Tectonics, v. 40, no. 4, p. e2020TC006532.

Khanal, G. P., Wang, J.-M., Wu, F.-Y., Wang, J.-G., and Yang, L., 2020, In-sequence buoyancy extrusion of the Himalayan Metamorphic Core, central Nepal: Constraints from monazite petrochronology and thermobarometry: Journal of Asian Earth Sciences, v. 199, p. 104406.

Kohn, M. J., 2008, P-T-t data from central Nepal support critical taper and repudiate large-scale channel flow of the Greater Himalayan Sequence: GSA Bulletin, v. 120, no. 3-4, p. 259-273.

Kohn, M. J., and Corrie, S. L., 2011, Preserved Zr-temperatures and U–Pb ages in high-grade metamorphic titanite: Evidence for a static hot channel in the Himalayan orogen: Earth and Planetary Science Letters, v. 311, no. 1, p. 136-143.

Lee, J., and Whitehouse, M. J., 2007, Onset of mid-crustal extensional flow in southern Tibet: Evidence from U/Pb zircon ages: Geology, v. 35, no. 1, p. 45-48.

Liu, Z.-C., Wu, F.-Y., Ji, W.-Q., Wang, J.-G., and Liu, C.-Z., 2014, Petrogenesis of the Ramba leucogranite in the Tethyan Himalaya and constraints on the channel flow model: Lithos, v. 208, p. 118-136.

Pan, G. T., Ding, J., Yao, D. S., and Wang, L. Q., 2004, Guidebook of 1:1,500,000 geologic map of the Qinghai-Tibet plateau and adjacent areas, Chengdu, China, Cartographic Publishing House, 148 p.:

Plank, T., and Langmuir, C. H., 1998, The chemical composition of subducting sediment and its consequences for the crust and mantle: Chemical Geology, v. 145, no. 3-4, p. 325-394.

Regis, D., Warren, C. J., Young, D., and Roberts, N. M. W., 2014, Tectono-metamorphic evolution of the Jomolhari massif: Variations in timing of syn-collisional metamorphism across western Bhutan: Lithos, v. 190-191, p. 449-466.

Rubatto, D., Chakraborty, S., and Dasgupta, S., 2013, Timescales of crustal melting in the Higher Himalayan Crystallines (Sikkim, Eastern Himalaya) inferred from trace element-constrained monazite and zircon chronology: Contributions to Mineralogy and Petrology, v. 165, no. 2, p. 349-372.

Rudnick, R., and Gao, S., 2003, Composition of the continental crust: Treatise on geochemistry, v. 3, p. 1-64.

Shellnutt, J. G., Bhat, G. M., Wang, K.-L., Brookfield, M. E., Jahn, B.-M., and Dostal, J., 2014, Petrogenesis of the flood basalts from the Early Permian Panjal Traps, Kashmir, India: Geochemical evidence for shallow melting of the mantle: Lithos, v. 204, p. 159-171.

Sun, S. S., and McDonough, W., 1989, Chemical and isotopic systematics of oceanic basalts: implications for mantle composition and processes: Geological Society, London, Special Publications, v. 42, no. 1, p. 313-345.

Tian, L., Wang, L., Zheng, H., and Yang, B. O., 2019, Eocene magmatism from the Liemai intrusion in the Eastern Tethyan Himalayan Belt and tectonic implications: Geological Magazine, v. 156, no. 3, p. 510-524.

Wang, J. M., Zhang, J. J., and Wang, X. X., 2013, Structural kinematics, metamorphic P–T profiles and zircon geochronology across the Greater Himalayan Crystalline Complex in south-central Tibet: implication for a revised channel flow: Journal of Metamorphic Geology, v. 31, no. 6, p. 607-628.

Wang, J., Zhang, J., Wei, C., Rai, S., Wang, M., and Qian, J., 2015b, Characterising the metamorphic discontinuity across the Main Central Thrust Zone of eastern-central Nepal: Journal of Asian Earth Sciences, v. 101, p. 83-100.

Wang, J.-M., Lanari, P., Wu, F.-Y., Zhang, J.-J., Khanal, G. P., and Yang, L., 2021, First evidence of eclogites overprinted by ultrahigh temperature metamorphism in Everest East, Himalaya: Implications for collisional tectonics on early Earth: Earth and Planetary Science Letters, v. 558, p. 116760.

Wang, J.-M., Rubatto, D., and Zhang, J.-J., 2015a, Timing of Partial Melting and Cooling across the Greater Himalayan Crystalline Complex (Nyalam, Central Himalaya): In-sequence Thrusting and its Implications: Journal of Petrology, v. 56, no. 9, p. 1677-1702.

Wang, J.-M., Wu, F.-Y., Rubatto, D., Liu, K., Zhang, J.-J., and Liu, X.-C., 2018, Early Miocene rapid exhumation in southern Tibet: Insights from P–T–t–D–magmatism path of Yardoi dome: Lithos, v. 304-307, p. 38-56.

Wang, J.-M., Wu, F.-Y., Rubatto, D., Liu, S.-R., Zhang, J.-J., Liu, X.-C., and Yang, L., 2017, Monazite behaviour during isothermal decompression in pelitic granulites: a case study from Dinggye, Tibetan Himalaya: Contributions to Mineralogy and Petrology, v. 172, no. 10, p. 81.

Wang, J.-M., Zhang, J.-J., Liu, K., Zhang, B., Wang, X.-X., Rai, S., and Scheltens, M., 2016, Spatial and temporal evolution of tectonometamorphic discontinuities in the central Himalaya: Constraints from P–T paths and geochronology: Tectonophysics, v. 679, p. 41-60.

Webb, A. A. G., Yin, A., and Dubey, C. S., 2013, U-Pb zircon geochronology of major lithologic units in the eastern Himalaya: Implications for the origin and assembly of Himalayan rocks: GSA Bulletin, v. 125, no. 3-4, p. 499-522.

Xu, J. F., and Castillo, P. R., 2004, Geochemical and Nd–Pb isotopic characteristics of the Tethyan asthenosphere: implications for the origin of the Indian Ocean mantle domain: Tectonophysics, v. 393, no. 1, p. 9-27.

Zeng, L., Gao, L.-E., Tang, S., Hou, K., Guo, C., and Hu, G., 2015, Eocene magmatism in the Tethyan Himalaya, southern Tibet: Geological Society, London, Special Publications, v. 412, no. 1, p. 287-316.

Zeng, L., Gao, L.-E., Xie, K., and Liu-Zeng, J., 2011, Mid-Eocene high Sr/Y granites in the Northern Himalayan Gneiss Domes: melting thickened lower continental crust: Earth and Planetary Science Letters, v. 303, no. 3, p. 251-266.

Zhang, Z., Xiang, H., Dong, X., Ding, H., and He, Z., 2015, Long-lived high-temperature granulite-facies metamorphism in the Eastern Himalayan orogen, south Tibet: Lithos, v. 212-215, p. 1-15.

Zhang, Z., Xiang, H., Dong, X., Li, W., Ding, H., Gou, Z., and Tian, Z., 2017, Oligocene HP metamorphism and anatexis of the Higher Himalayan Crystalline Sequence in Yadong region, east-central Himalaya: Gondwana Research, v. 41, p. 173-187.
